# Supplementary material for: The protease GtgE from Salmonella exclusively targets inactive Rab GTPases
Source: PubMed Central journal article supplement (PMC5752668; doi:10.1038/s41467-017-02110-1), 2018-01-03
Supplement: 41467_2017_2110_MOESM1_ESM.pdf [file 41467_2017_2110_MOESM1_ESM.pdf]

# Supplementary Information

## The protease GtgE from *Salmonella* exclusively targets inactive Rab GTPases

### Table of Contents

|                               |    |
|-------------------------------|----|
| Supplementary Figures .....   | 2  |
| Supplementary Figure 1 .....  | 2  |
| Supplementary Figure 2 .....  | 3  |
| Supplementary Figure 3 .....  | 4  |
| Supplementary Figure 4 .....  | 5  |
| Supplementary Figure 5 .....  | 6  |
| Supplementary Figure 6 .....  | 7  |
| Supplementary Figure 7 .....  | 7  |
| Supplementary Figure 8 .....  | 8  |
| Supplementary Figure 9 .....  | 9  |
| Supplementary Figure 10 ..... | 10 |
| Supplementary Figure 11 ..... | 10 |
| Supplementary Figure 12 ..... | 11 |
| Supplementary Figure 13 ..... | 12 |
| Supplementary Figure 14 ..... | 13 |
| Supplementary Figure 15 ..... | 14 |
| Supplementary Figure 16 ..... | 15 |
| Supplementary Figure 17 ..... | 16 |
| Supplementary Figure 18 ..... | 17 |
| Supplementary Tables .....    | 18 |
| Supplementary Table 1.....    | 18 |
| Supplementary Table 2.....    | 19 |
| Supplementary Table 3.....    | 20 |
| Supplementary References..... | 21 |

## Supplementary Figures

### Supplementary Figure 1

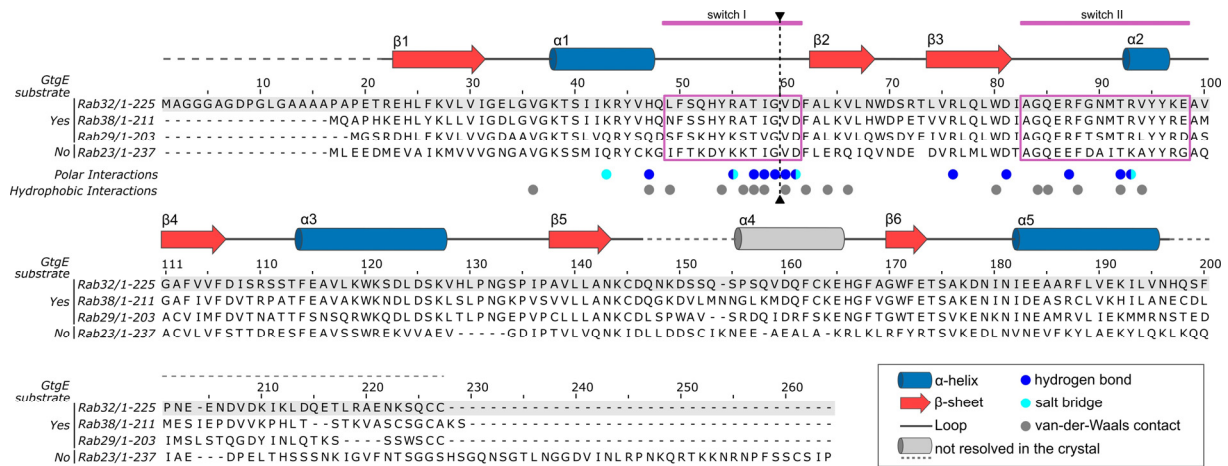

**Supplementary Fig. 1.** Sequence alignment of the GtgE-substrates Rab32, Rab38, and Rab29 in comparison to the non-GtgE substrate Rab23. Secondary structure annotations above the sequences refer to the Rab32:GDP:GtgE<sub>C45A</sub>-complex. Blue or grey dots below the sequences indicate polar and hydrophobic interactions of Rab32 with GtgE in the complex structure. Magenta: switch regions; black arrow and dashed line: GtgE cleavage site in Rab32, Rab38, and Rab29.

## Supplementary Figure 2

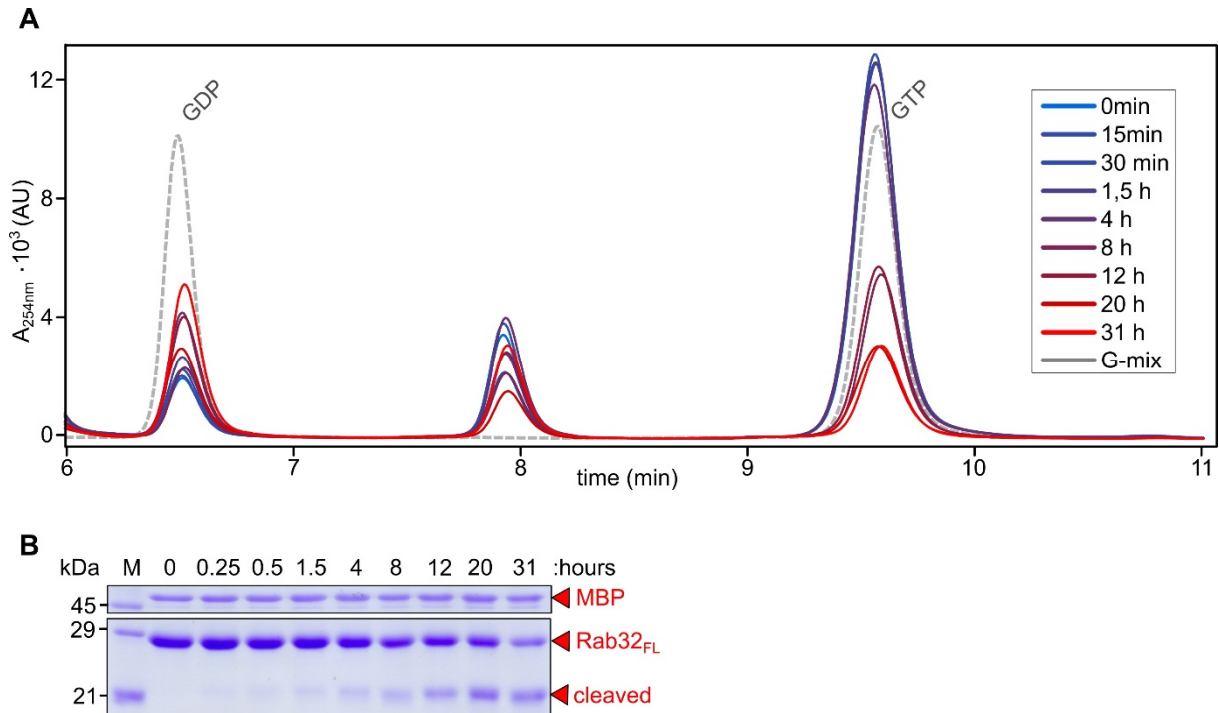

### Supplementary Fig. 2. GTP-hydrolysis and proteolytic cleavage of Rab32:GTP.

**(A)** Intrinsic GTP-hydrolysis activity of Rab32. Time-dependent GTP-to-GDP-hydrolysis by Rab32 loaded with GTP was monitored using ion-pairing reversed phase chromatographic separation of GDP and GTP. Integrated peaks were used for the quantification of nucleotide content. The rate constant of GTP-hydrolysis was determined from single exponential fitting of the GTP-conversion with time (Fig. 1C). G-mix contains GDP and GTP as chromatographic references.

**(B)** Time-dependent GtgE-mediated (8 nM) cleavage of Rab32:GTP (8  $\mu$ M final) in a SDS-PAGE based gel shift assay stained with Coomassie. MBP was used as internal standard for quantification. The observed rate constant for proteolysis was obtained from time-dependent single exponential fit of the Rab32<sub>FL</sub> concentration. The Rab32 level was determined from the SDS-PAGE band intensity, which was analyzed densitometrically (Fig. 1C).

### Supplementary Figure 3

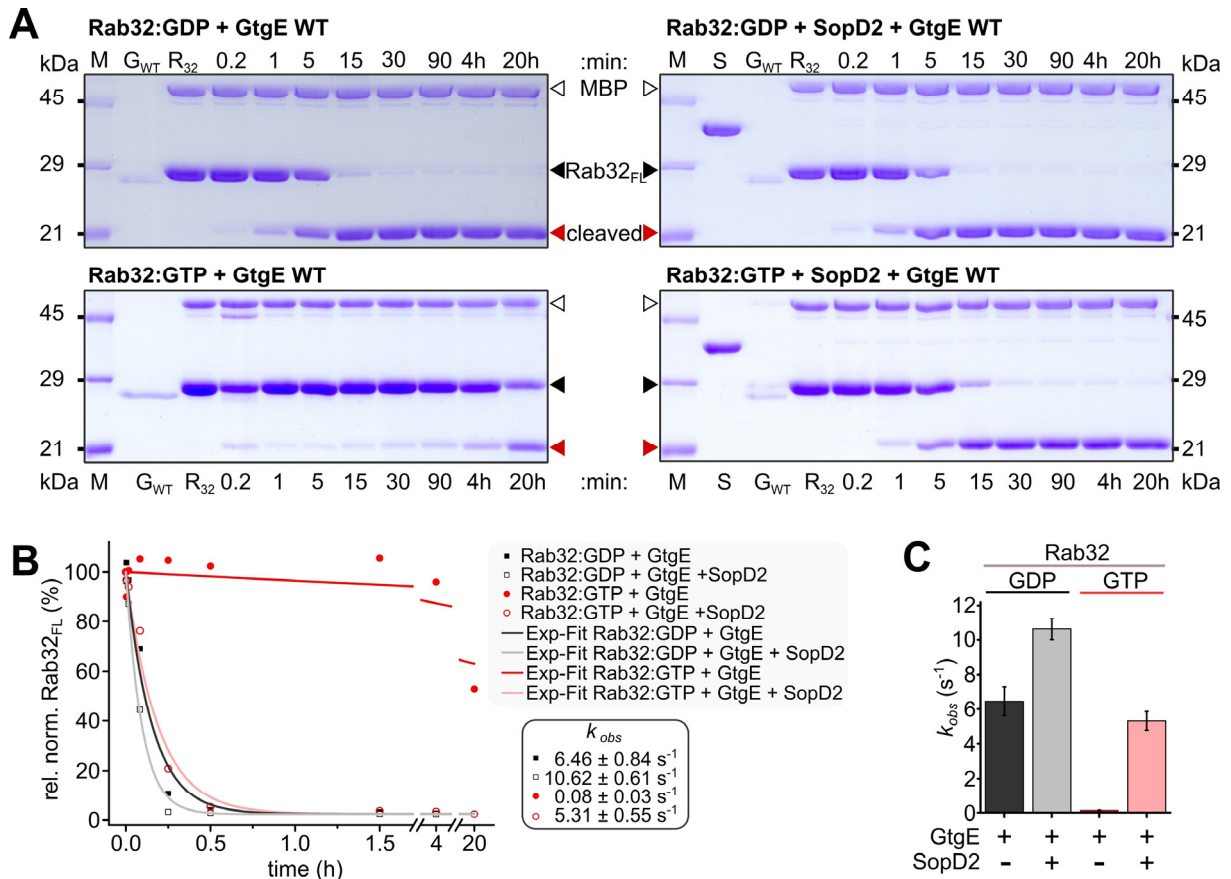

**Supplementary Fig. 3.** Dependence of Rab32-cleavage by GtgE on SopD2 mediated GTPase activation.

**(A)** SopD2 interference with GtgE mediated proteolytic Rab32 cleavage over time analysed by Coomassie-stained SDS-PAGE. Rab32<sub>FL</sub> (R<sub>32</sub>; 8  $\mu$ M) was challenged with GtgE (G<sub>WT</sub>; 8 nM) and/or SopD2 (S; 80 nM). White triangle: MBP standard; black arrow Rab32<sub>FL</sub>; red arrow cleavage product Rab32<sub>60-225</sub>.

**(B)** Densitometric quantification of the time-dependent decrease of Rab32<sub>FL</sub> bands from A. Signal intensity was normalized for the internal standard MBP. Data was fitted to a single exponential function to yield the observed rate constants ( $k_{obs}$ ) (bottom right).

**(C)** Bar graph of the determined rate constant from B.



**Supplementary Figure 4**

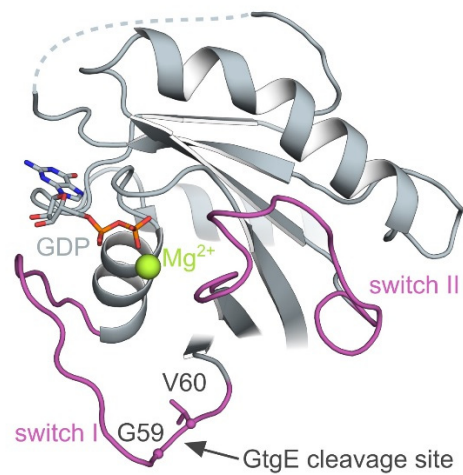

**Supplementary Fig. 4.** Structural context of the Rab32-cleavage site on the basis of the Rab32:GDP:GtgE<sub>C45A</sub>-complex crystal structure. The GtgE cleavage site is highlighted in the ball and sticks representation of Rab32 residues Gly59 and Val60. Magenta loops: switch regions; sticks: GDP; green sphere: Mg<sup>2+</sup>-ion.

### Supplementary Figure 5

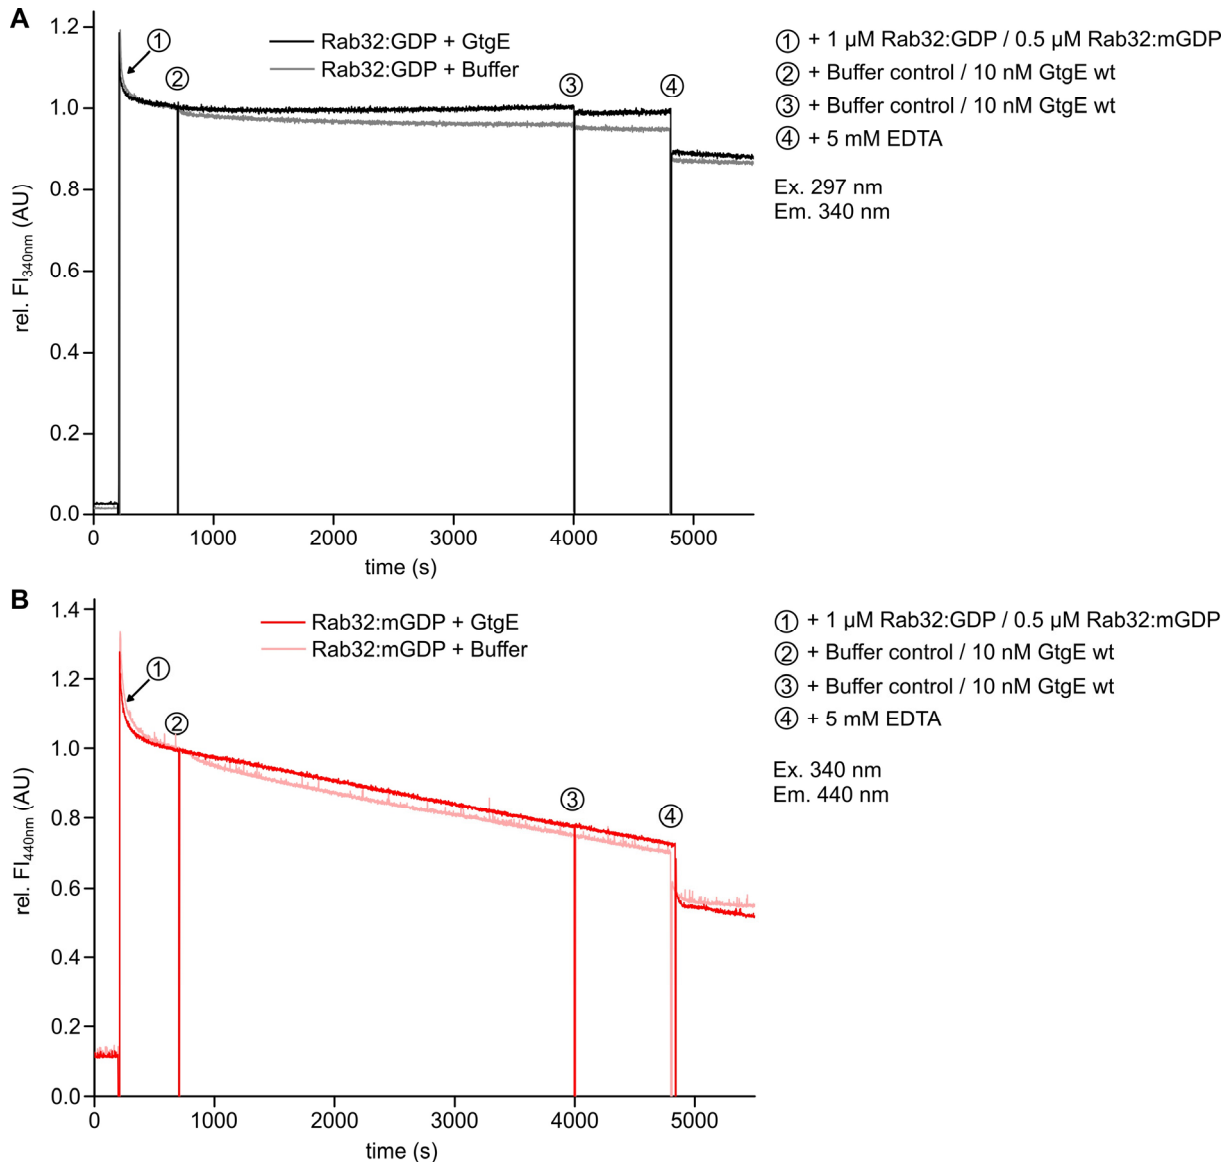

**Supplementary Fig. 5.** The GtgE-mediated Rab32-proteolysis cannot be monitored using established fluorescence methods. Rab32-proteolysis has been subjected to time dependent fluorescence experiments. Fluorescence intensity testing of GtgE-mediated Rab32-cleavage by Rab32 tryptophane fluorescence (**A**) or Rab32:mantGDP fluorescence (**B**). There is no significant difference of the fluorescence change in the absence or presence of GtgE, indicating that these assays are unsuitable for monitoring Rab32-proteolysis by GtgE.

### Supplementary Figure 6

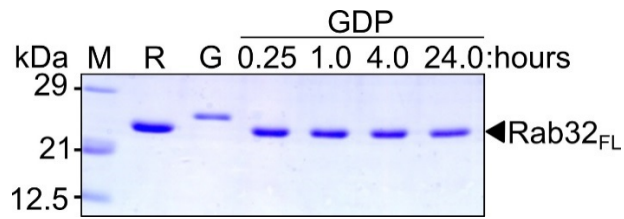

**Supplementary Fig. 6.** The GtgE-mutant GtgE<sub>C45A</sub> lacks proteolytic activity. Rab32<sub>FL</sub>:GDP (R, 8  $\mu$ M) was incubated with GtgE<sub>C45A</sub> (G, 8 nM) and samples were analyzed by Coomassie-stained SDS-PAGE at indicated time points. In contrast to wild type GtgE, the mutant GtgE<sub>C45A</sub> is proteolytically inactive as indicated by a lack of shift in Rab32<sub>FL</sub> molecular weight.

### Supplementary Figure 7

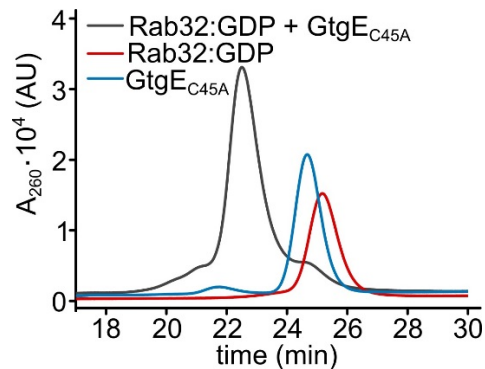

**Supplementary Fig. 7.** Complex formation of Rab32:GDP with GtgE<sub>C45A</sub> in analytical size exclusion chromatography. Rab32:GDP and GtgE<sub>C45A</sub> (8  $\mu$ M each) were analyzed separately in SEC-buffer (supplemented with 10  $\mu$ M GDP) as references. The decrease in elution time for the Rab32:GDP and GtgE<sub>C45A</sub> complex mixture indicates an increase in molecular weight relative to the individual proteins and demonstrates successful complex formation.

## Supplementary Figure 8

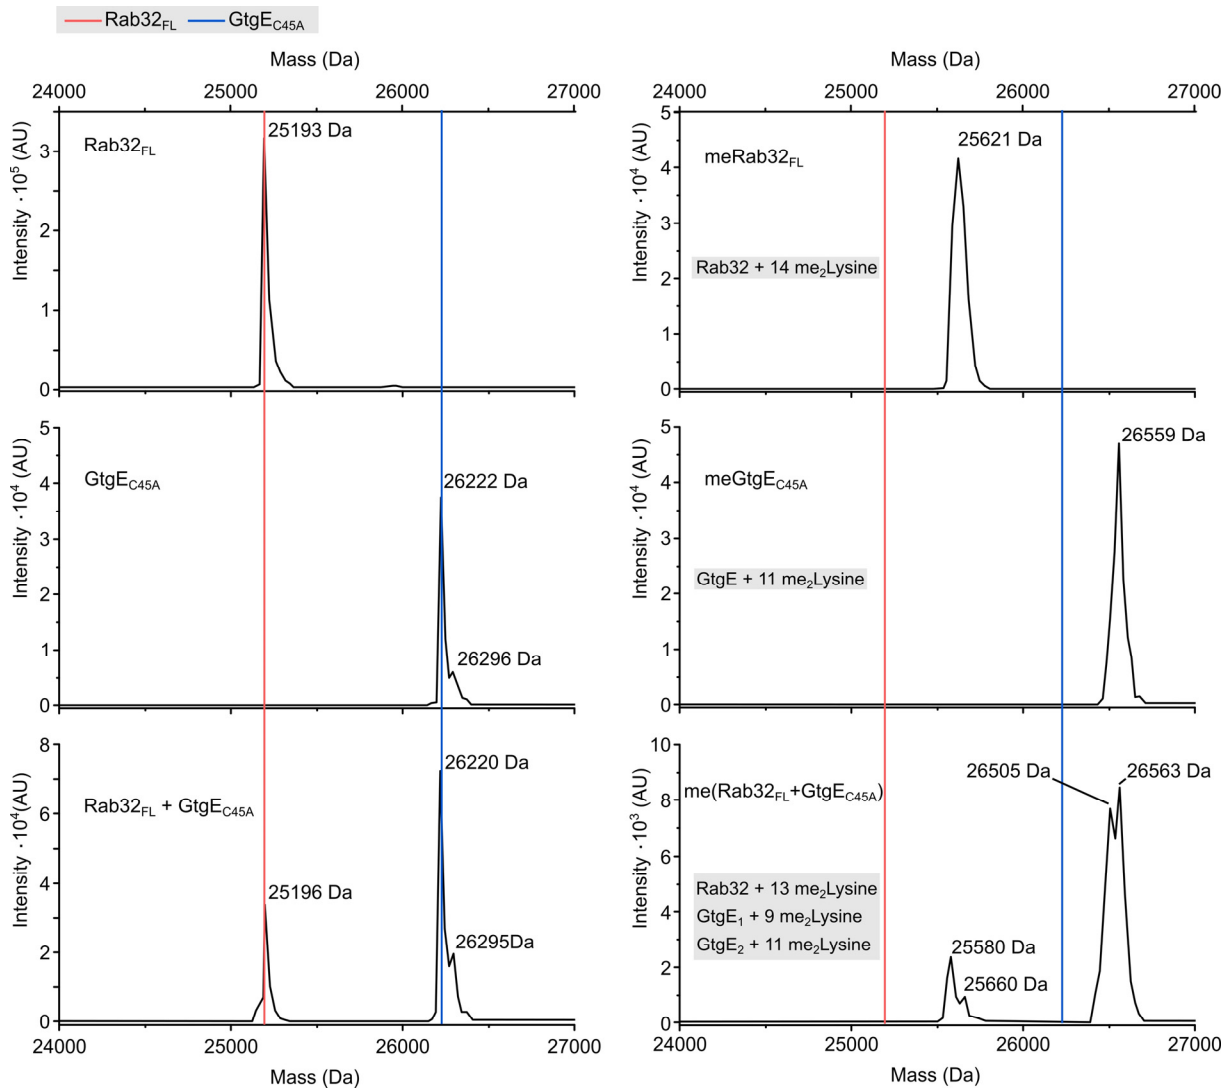

**Supplementary Fig. 8.** Mass spectrometry analysis of the methylated full length Rab32:GDP:GtgE<sub>C45A</sub> complex.

**Left panel:** top, Rab32<sub>FL</sub>; middle, GtgE<sub>C45A</sub>; bottom, 1:1 mixture of Rab32<sub>FL</sub> and GtgE<sub>C45A</sub>.

**Right panel:** analysis of methylated (me) proteins (top, meRab32<sub>FL</sub>; middle, meGtgE<sub>C45A</sub>; bottom, 1:1 mixture of the preformed complex me(Rab32<sub>FL</sub>:GtgE<sub>C45A</sub>)). The red and blue lines indicate the theoretical masses of Rab32<sub>FL</sub> ( $M_{\text{cal}}(\text{Rab32}_{\text{FL}}) = 25191$  Da) and GtgE<sub>C45A</sub> ( $M_{\text{cal}}(\text{GtgE}_{\text{C45A}}) = 26226$  Da), respectively. Grey boxes: number of detected dimethylated lysines in the corresponding experiments.

### Supplementary Figure 9

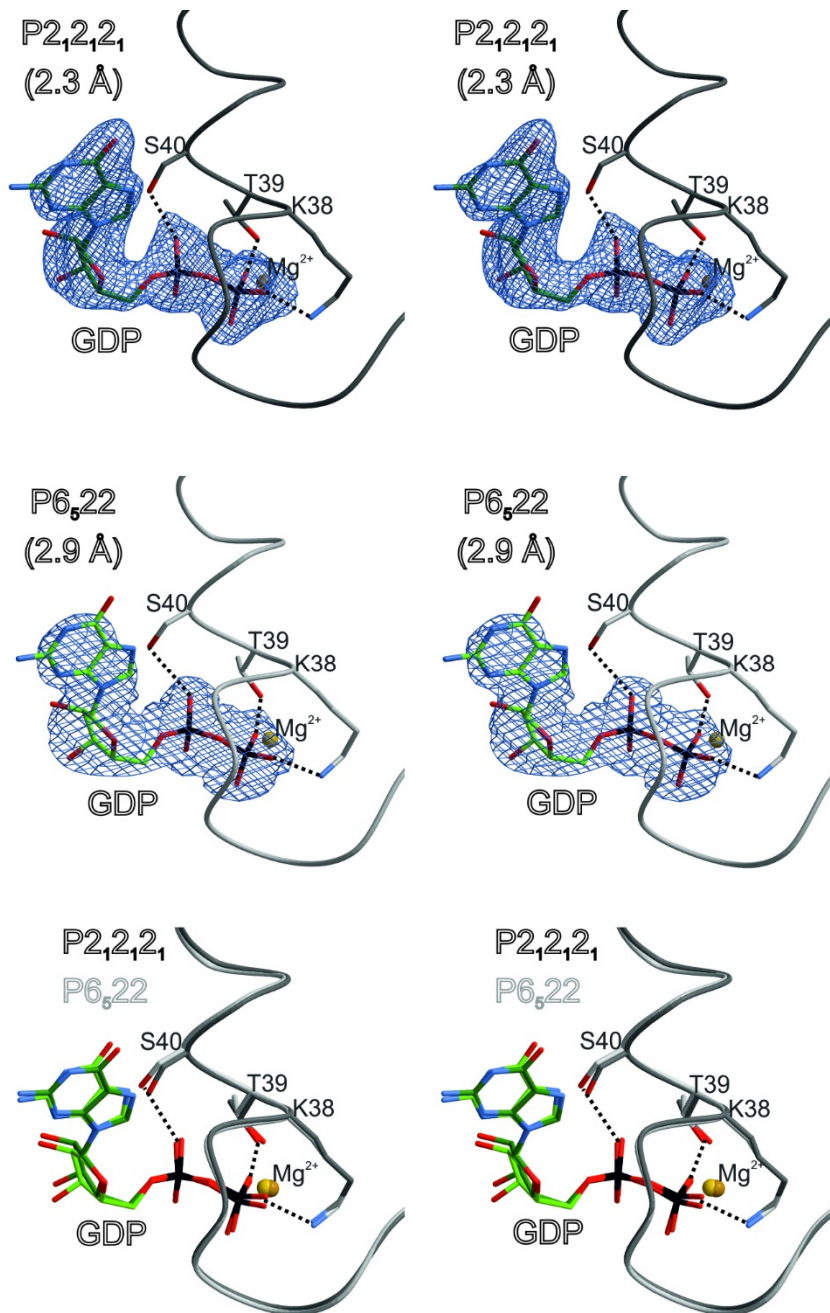

**Supplementary Fig. 9.** Comparison of the electron density of GDP in the full length and truncated Rab32:GtgE<sub>C45A</sub> complex structures depicted as stereo-view images.

Sections of the P-loop, the GDP-molecule and the magnesium ion of Rab32<sub>18-201</sub>:GDP:GtgE<sub>21-214,C45A</sub> (top panel, PDB ID: 5OEC, space group P2<sub>1</sub>2<sub>1</sub>2<sub>1</sub>, 2.3 Å resolution) and Rab32<sub>FL</sub>:GDP:GtgE<sub>FL,C45A</sub> (middle panel, PDB ID: 5OED, space group P6<sub>5</sub>22, 2.9 Å resolution), respectively. The 2F<sub>O</sub>–F<sub>C</sub> electron-density maps depict the GDP nucleotides, which have been excluded prior to phase calculations (blue mesh, contour level at 1σ).

Structural superposition of both crystal structures revealing a close match of both complexes within this region (bottom panel).

### Supplementary Figure 10

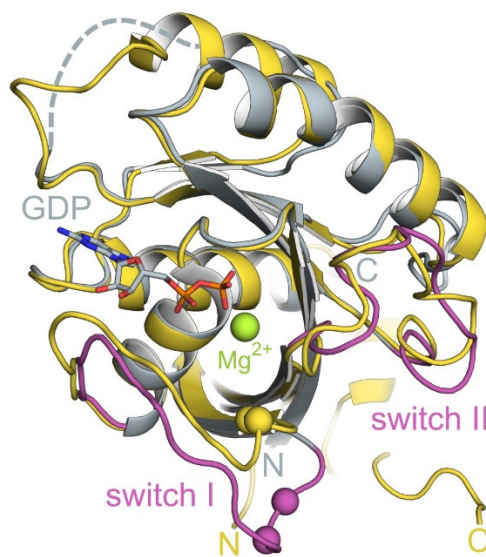

**Supplementary Fig. 10.** Structural superposition of Rab32 from the Rab32:GDP:GtgE<sub>C45A</sub> complex (grey) and Ypt1 from the yeast Ypt1:GDP:GDI complex (yellow, PDB ID: 1UKV<sup>1</sup>). The switch regions (indicated as magenta loops in Rab32) adopt a similar conformation that is clearly different from the active, GTP-bound conformations (see Fig. 3B). The switch structures are more reminiscent of but not equal to a GDI-bound state. Spheres: C $\alpha$ -atoms of the GtgE cleavage site with the homologue positions also indicated in Ypt1; sticks: GDP; green sphere: Mg<sup>2+</sup>-ion.

### Supplementary Figure 11

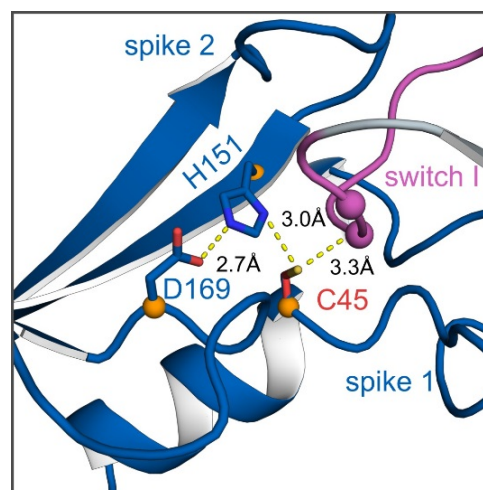

**Supplementary Fig. 11.** Model of the active catalytic triad in GtgE with the Rab32-substrate bound to the active site. The inactivating GtgE-mutation C45A<sub>G</sub> was reversed *in silico* using the PyMOL software<sup>2</sup>, revealing a correctly aligned cysteine protease catalytic triad (*i.e.* constituted by C45<sub>G</sub>, H151<sub>G</sub>, and D169<sub>G</sub>). Magenta loop: switch I of Rab32 from the Rab32:GDP:GtgE-complex; orange spheres and sticks: C $\alpha$ -atoms and residues forming the catalytic triad, respectively; red sticks: *in silico* positioned cysteine at position 45 of GtgE in exchange for alanine; yellow dashed lines: distance measurements.

## Supplementary Figure 12

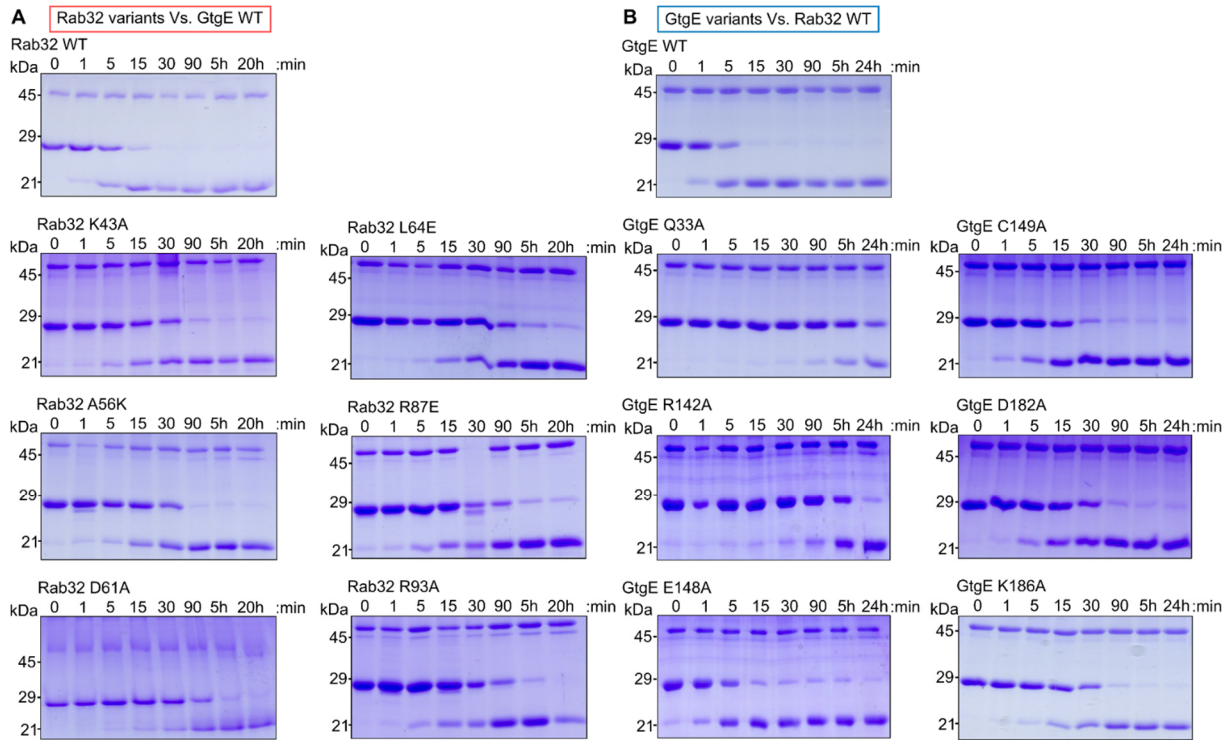

**Supplementary Fig. 12.** Mutational analysis of Rab32 and GtgE using a Coomassie-stained SDS-PAGE-based proteolytic Rab32 cleavage assay. These data form the basis for determining proteolytic rate constants as described in Supplementary Fig. 13.

**(A)** Proteolysis of Rab32:GDP and mutants thereof (8  $\mu$ M) by wild type GtgE (8 nM).

**(B)** Proteolysis of Rab32:GDP (8  $\mu$ M) with GtgE and mutants thereof (8 nM).



## Supplementary Figure 13

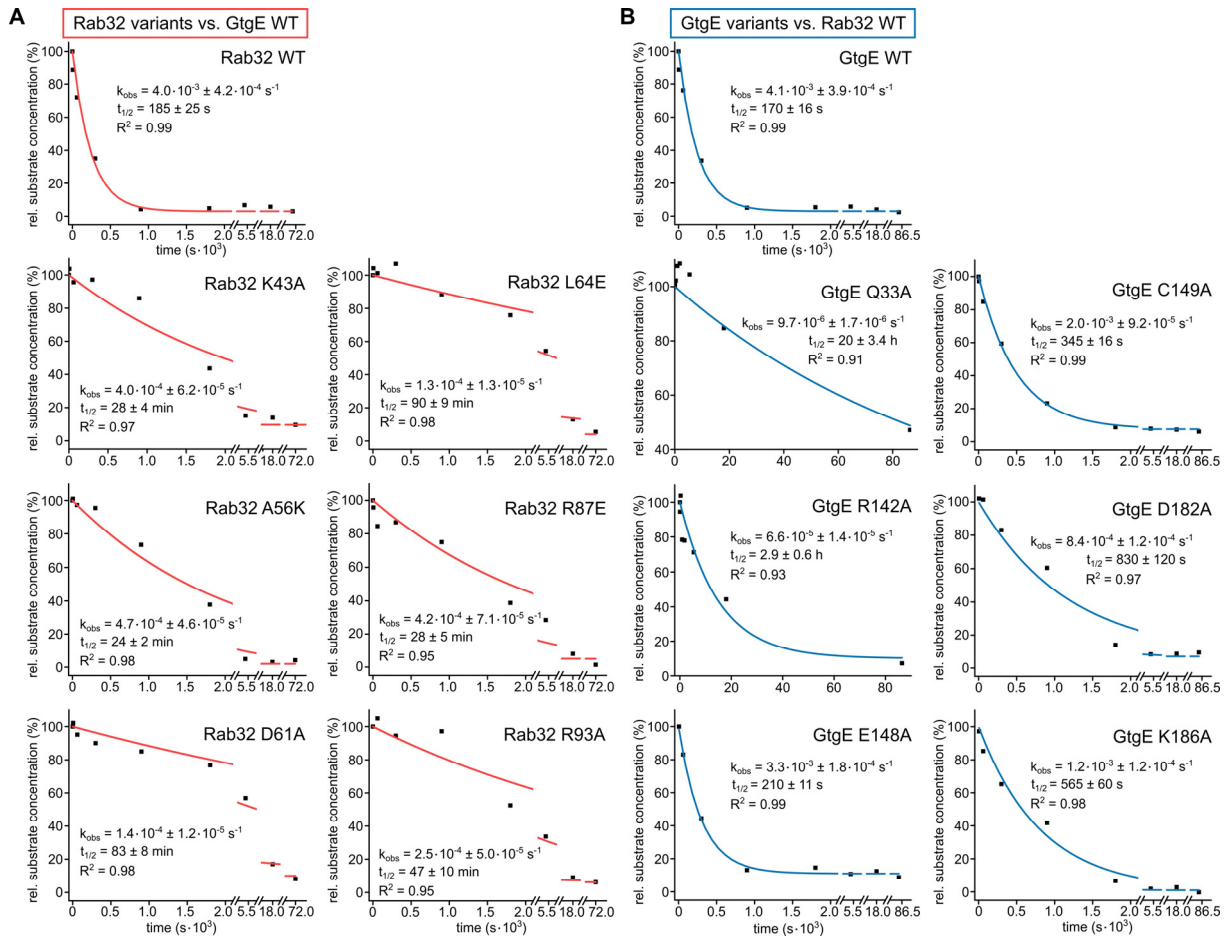

**Supplementary Fig. 13.** Determination of proteolytic rates GtgE for the Rab32-substrate and mutants thereof. Results are based on densitometric analysis of proteolytic Rab32-cleavage assays monitored by Coomassie-stained SDS-PAGE (Supplementary Fig. 12). The time-dependent decrease of Rab32<sub>FL</sub> was fitted to a single exponential function to yield the observed rate constants ( $k_{obs}$ ). The  $k_{obs}$ -values have also been converted to half-lives ( $t_{1/2}$ ) following the relationship  $t_{1/2} = \ln 2 / k_{obs}$ . Single exponential fits correspond to the experimental data very well as indicated by an  $R^2$ -value close to 1. Errors represent the standard deviation of the exponential fit.

**(A)** Rab32:GDP mutants (8  $\mu$ M) and wild type incubated with wild type GtgE (8 nM) (red curves).

**(B)** GtgE mutants and wild type (both 8 nM final) were incubated with wild type Rab32:GDP (8  $\mu$ M) (blue curves).



## Supplementary Figure 14

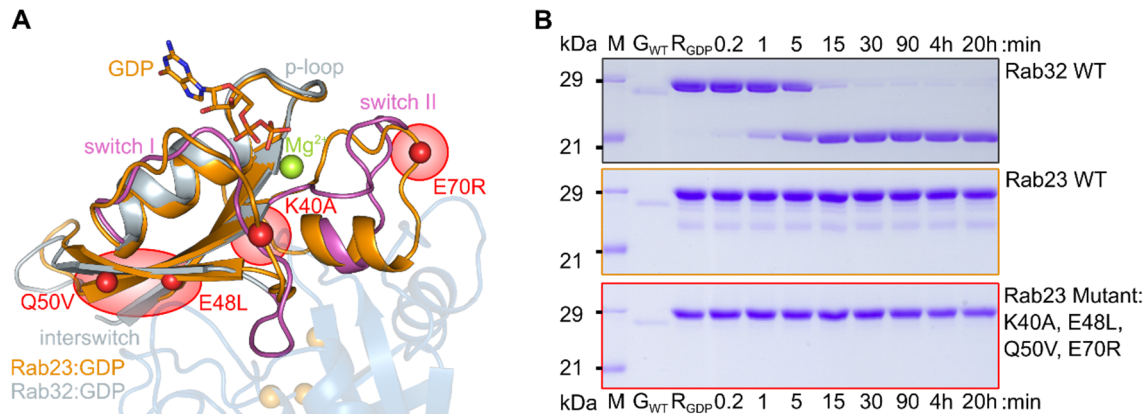

**Supplementary Fig. 14.** Exploration of the GtgE Rab-substrate specificity with a selected Rab23 mutant. Choice of mutation positions was guided by sequence alignment and interaction site analysis from the Rab32:GtgE-complex (see Supplementary Fig. 1).

**(A)** Structural superposition of the Rab23:GDP (orange) and Rab32:GDP (grey) in complex with GtgE<sub>C45A</sub> (blue, transparent) depicted as cartoon. Mutations in Rab23 to the corresponding amino acid from Rab32 were identified in three hot spots highlighted in red circles: switch I (K40A); interswitch (E48L; Q50V); switch II (E70R). Highlighted as red spheres: C<sub>α</sub>-atoms of respective mutations, sticks: GDP, magenta: switch regions, green sphere: Mg<sup>2+</sup>-ion.

**(B)** Time dependent GtgE proteolysis gel shift assay of Rab32:GDP, Rab23:GDP, and Rab23:GDP mutant (K40A; E48L; Q50V; E70R). GtgE is unable to cleave Rab23 or Rab23-mutant containing respective Rab32-mutations, indicating that further structural determinants contribute to the Rab-specificity of the protease. Abbreviations: GtgE WT (G<sub>WT</sub>, 8 nM), respective GDP-bound Rab (R<sub>GDP</sub>, all 8 μM) without GtgE added.

**Supplementary Figure 15**

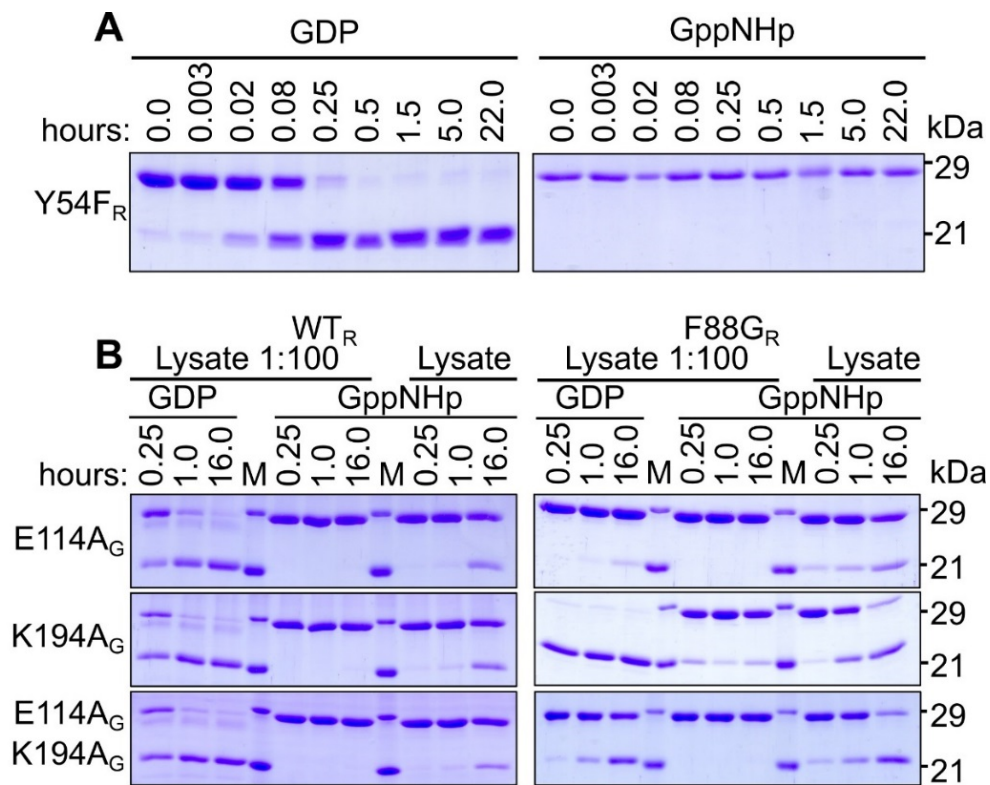

**Supplementary Fig. 15.** Qualitative analysis of the impact of mutations in potential nucleotide specificity hubs by gel shift activity assay.

**(A)** Significance of hub 2 mutant Y54F<sub>R</sub> loaded with GDP or GppNHp (compare with Fig. 5D).

**(B)** Significance of hub 3 mutants: Rab F88G loaded with GDP or GppNHp was treated with cleared *E. coli* lysate (or 1:100 diluted lysate) with overexpressed GtgE E114A, K194A, or the double mutant over time, respectively (see Fig. 5F).

**Supplementary Figure 16**

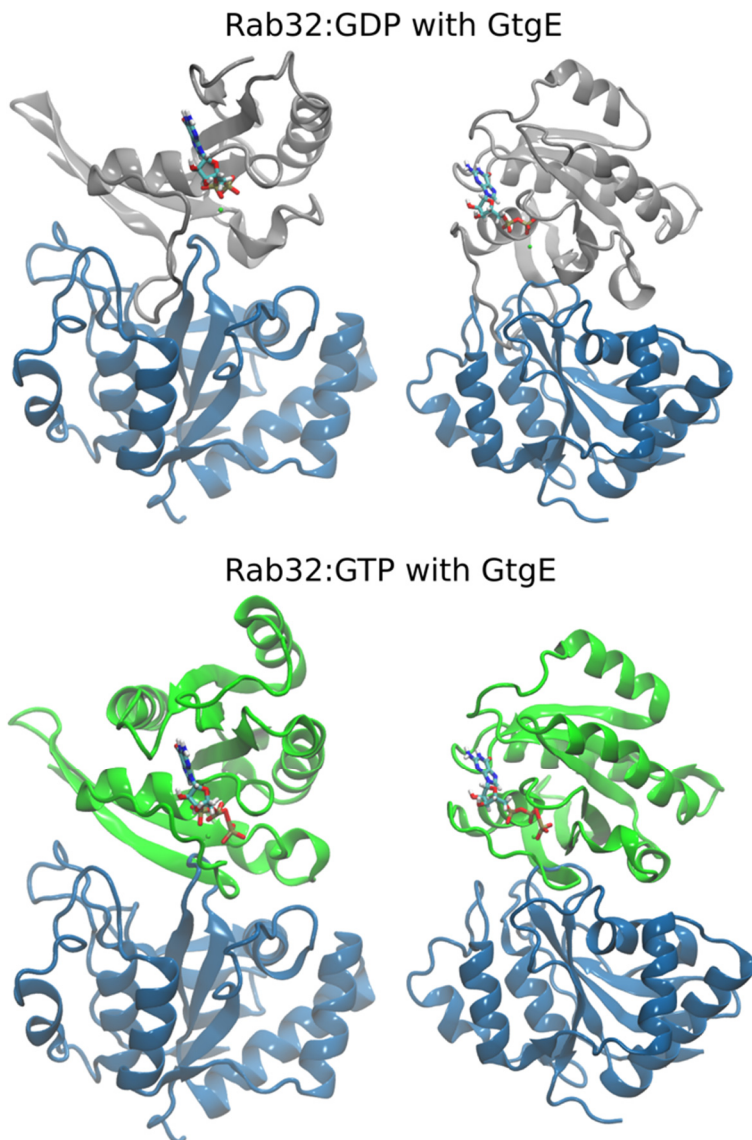

**Supplementary Fig. 16.** Models of GDP-bound (top panel) and a hypothetical GTP-bound Rab32 (bottom panel) in complex with wild type GtgE as starting points for atomistic molecular dynamics simulations. The GDP-bound Rab:GtgE complex is constituted based on the presented crystal structure from this work. The hypothetical GTP-bound complex structure is based on the active state Rab32 in complex with GppCH<sub>2</sub>p and its effector binding domain VARP-ANKRD1 (PDB ID: 4CYM). Only the hypothetic Rab32:GTP:GtgE results in steric conflicts along the protein-protein interface particularly in the Rab switch I region with the spike 2 loop in GtgE. Both complexes are additionally shown 45° tilted on the y-axis.

**Supplementary Figure 17**

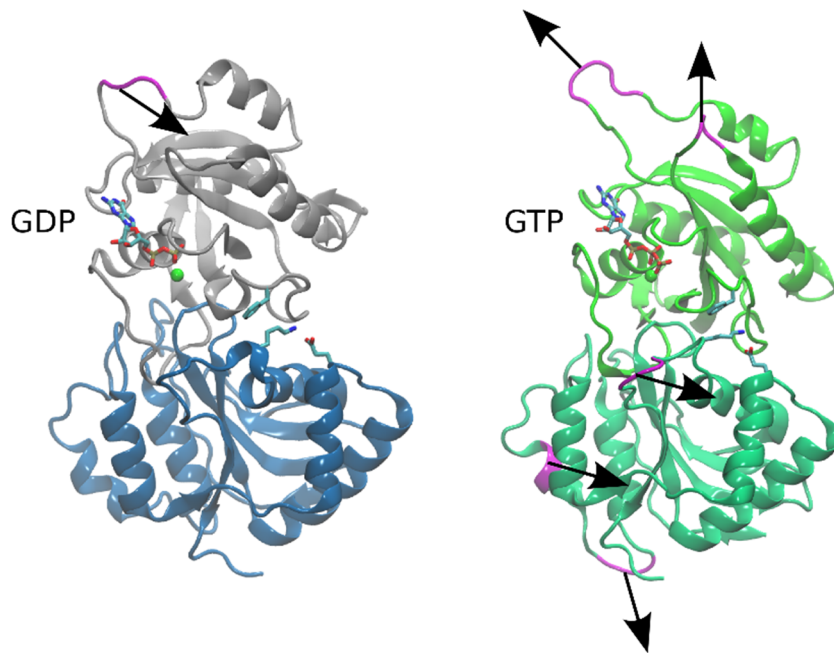

**Supplementary Fig. 17.** Principal component analysis of the Rab32:GtgE-complex in two different activity states. The figure shows the first modes of the principal component analysis of the Rab32:GDP:GtgE-complex (left) and the putative Rab32:GTP:GtgE-complex (right). While Rab32 (grey) of the GDP-complex only shows a single movement of a loop structure (purple), the GTP-complex reveals movements of two loop structures in Rab32 (light green) and three movements in GtgE (dark green). Interestingly, most of the movements of the GTP-complex point away from the interaction site of Rab32 and GtgE, while the movement of the GDP-complex points towards the interaction site of both domains. The diametral protein movements in the GTP-complex are supporting the complex dissociation for active Rab32:GTP, consistent with the strict GDP-state preference of GtgE for Rab32. The normal modes shown here, indicated by black arrows, comprise ca. 74% (GDP-complex) and ca. 77 % (GTP-complex) of their overall global motion.

## Supplementary Figure 18

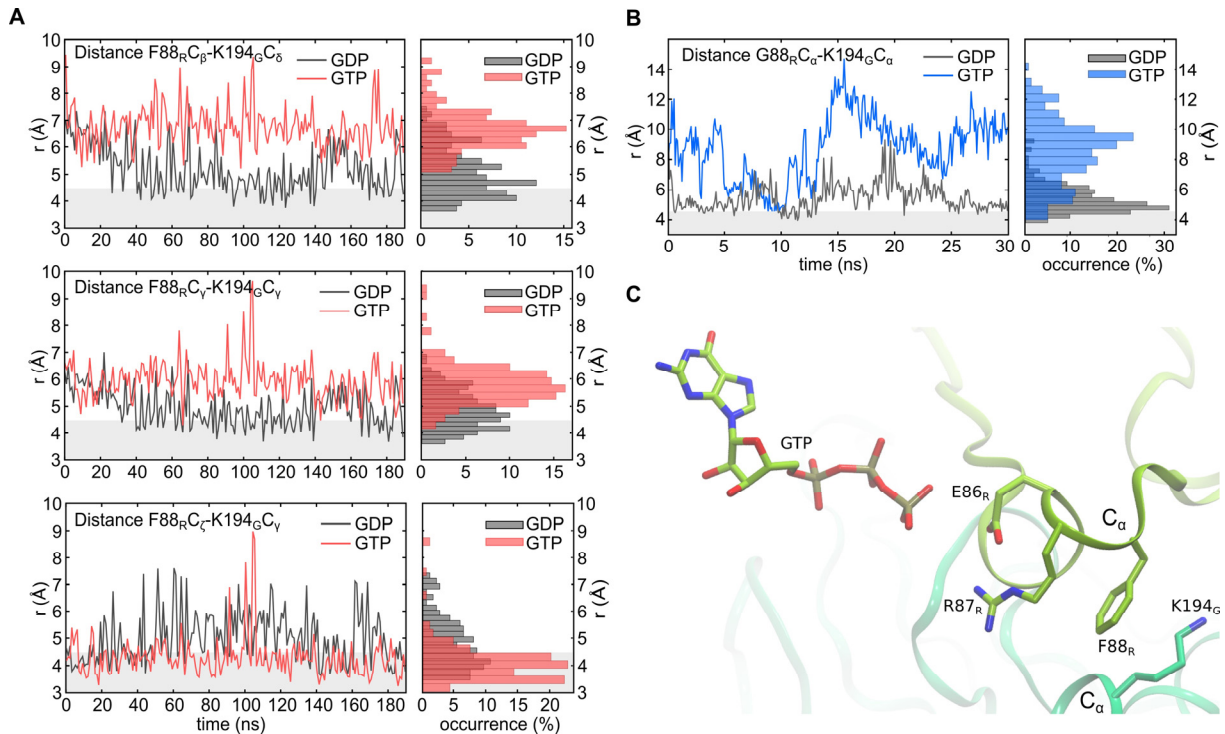

**Supplementary Fig. 18.** Selected atom pair distances in a GDP-bound and hypothetical GTP-bound Rab32:GtgE-complex from MD-simulations (left panels), and respective distance occurrences shown as histograms (right panels). The distance threshold for van-der-Waals interactions ( $<4.5$  Å) is marked as grey shaded area.

**(A)** The F88<sub>R</sub> may form a decisive element for the GDP-state preference of GtgE toward Rab32. Specific atom-pair distances are shown for F88<sub>R</sub> of Rab32 and K194<sub>G</sub> GtgE (*top panel*: F88<sub>R</sub>C<sub>β</sub>-K194<sub>G</sub>C<sub>δ</sub>, *middle*: F88<sub>R</sub>C<sub>γ</sub>-K194<sub>G</sub>C<sub>γ</sub>, *bottom*: F88<sub>R</sub>C<sub>ζ</sub>-K194<sub>G</sub>C<sub>γ</sub>) from MD-simulations of the GDP- (in black) and GTP-bound (in red) Rab32:GtgE-complexes (see Fig. 5B right panels). A hydrophobic interaction between F88<sub>R</sub> and K194<sub>G</sub> is indicated based on all traces in the GDP-bound complex (black), whereas the hypothetical GTP-bound complex leads to an increase in the distance between F88<sub>R</sub>C<sub>β</sub>-K194<sub>G</sub>C<sub>δ</sub> and F88<sub>R</sub>C<sub>γ</sub>-K194<sub>G</sub>C<sub>γ</sub>, but not between F88<sub>R</sub>C<sub>ζ</sub>-K194<sub>G</sub>C<sub>γ</sub> (in red). This suggests that the van-der-Waals interactions between Rab32 and GtgE are decreased in the hypothetical GTP-state, which could lead to dissociation of GtgE from Rab32.

**(B)** Atom-pair distances in the F88<sub>G</sub><sub>R</sub> mutant based on MD simulations of the GDP- (in black) and GTP-bound (in red) Rab32:GtgE-complexes. In F88<sub>G</sub><sub>R</sub>, a higher population of G88<sub>R</sub>-K194<sub>G</sub> interactions ( $<4.5$  Å) are formed relative to the wild type (Fig. 5E).

**(C)** Structural representation of the MD simulation of the hypothetical GTP-bound Rab32:GtgE-complex after 190 ns. Highlighted in sticks: hub 1 residue E86<sub>R</sub> with R87<sub>R</sub> forming an ion pair (see Fig. 5A and Fig. 5F, top) and the hub 3 residues F88<sub>R</sub> and K194<sub>G</sub> with an distance increase of the C<sub>α</sub>-atoms (see Fig. 5E, bottom).

## Supplementary Tables

### Supplementary Table 1.

Crystallographic statistics of the full length and truncated Rab32:GDP:GtgE<sub>C45A</sub>-complex.

|                                                         | Rab32 (18-201):GDP-GtgE (21-214) C45A         | Rab32:GDP-GtgE C45A       |
|---------------------------------------------------------|-----------------------------------------------|---------------------------|
| <u>Crystal parameters</u>                               |                                               |                           |
| Space group                                             | P2 <sub>1</sub> 2 <sub>1</sub> 2 <sub>1</sub> | P6 <sub>5</sub> 22        |
| Cell constants (Å)                                      | a = 47.8 , b = 67.0<br>c = 111.1              | a = b = 67.4<br>c = 427.3 |
| Copies in asym. unit                                    | 1                                             | 1                         |
| <u>Data collection &amp; processing</u>                 |                                               |                           |
| X-ray source                                            | SLS, X06DA                                    | SLS, X06DA                |
| Wavelength (Å)                                          | 1.0                                           | 1.0                       |
| Resolution range (Å) <sup>[a]</sup>                     | 50-2.3 (2.4-2.3)                              | 50-2.9 (3.0-2.9)          |
| No. observations                                        | 82247                                         | 69825                     |
| No. unique observations                                 | 16142                                         | 13564                     |
| Completeness (%) <sup>[a]</sup>                         | 97.4 (93.0)                                   | 96.8 (98.1)               |
| R <sub>merge</sub> (%) <sup>[a,b]</sup>                 | 8.2 (52.3)                                    | 6.2 (53.2)                |
| CC <sub>1/2</sub> (%) <sup>[a]</sup>                    | 99.7 (89.6)                                   | 99.9 (83.4)               |
| I/σ (I) <sup>[a]</sup>                                  | 13.8 (3.6)                                    | 18.9 (2.9)                |
| <u>Refinement</u>                                       |                                               |                           |
| Resolution range (Å)                                    | 15-2.3                                        | 15-2.9                    |
| No. refl. working set                                   | 16068                                         | 13425                     |
| No. refl. test set                                      | 1603                                          | 1343                      |
| No. non hydrogen (protein)                              | 2838                                          | 2906                      |
| No. of ligand atoms                                     | GDP 28<br>Mg 1                                | 28<br>1                   |
| Water molecules                                         | 55                                            | 13                        |
| R <sub>work</sub> /R <sub>free</sub> (%) <sup>[c]</sup> | 20.8 / 24.5                                   | 20.1 / 24.0               |
| r.m.s.d. bond (Å) / (°) <sup>[d]</sup>                  | 0.002 / 0.435                                 | 0.004 / 0.527             |
| Average B-factor (Å <sup>2</sup> )                      | Protein 56.6<br>GDP; Mg 60.2<br>Water 42.7    | 85.2<br>114.5<br>57.1     |
| Ramachandran Plot (%) <sup>[e]</sup>                    | 97.3 / 2.4 / 0.3                              | 97.7 / 2.0 / 0.3          |

<sup>[a]</sup> The values in parentheses of resolution range, completeness, R<sub>merge</sub>, CC<sub>1/2</sub> and I/σ (I) correspond to the last resolution shell. <sup>[b]</sup>  $R_{\text{merge}}(I) = \sum_{hkl} \sum_j |I(hkl)_j - \langle I(hkl) \rangle| / \sum_{hkl} I_{hkl}$ , where  $I(hkl)_j$  is the measurement of the intensity of reflection  $hkl$  and  $\langle I(hkl) \rangle$  is the average intensity. <sup>[c]</sup>  $R = \sum_{hkl} | |F_{\text{obs}}| - |F_{\text{calc}}| | / \sum_{hkl} |F_{\text{obs}}|$ , where R<sub>free</sub> is calculated without a sigma cut off for a randomly chosen 5% of reflections, which were not used for structure refinement, and R<sub>work</sub> is calculated for the remaining reflections. <sup>[d]</sup> Deviations from ideal bond lengths/angles. <sup>[e]</sup> Number of residues in favored region / allowed region / outlier region.



**Supplementary Table 2.**

Molecular interactions in the Rab32:GDP:GtgE-complex between Rab32<sub>18-201</sub>:GDP and GtgE<sub>21-214, C45A</sub> (Fig. 3E). **(A)** Polar interactions including salt bridges with the respective atom distances of interacting atom pairs. **(B)** Hydrophobic interactions shown as in A.

| <b>A</b>                  |                     |                            | <b>B</b>                        |                     |                            |
|---------------------------|---------------------|----------------------------|---------------------------------|---------------------|----------------------------|
| <b>Polar Interactions</b> |                     |                            | <b>Hydrophobic Interactions</b> |                     |                            |
| <b>Rab32</b>              | <b>Distance (Å)</b> | <b>GtgE<sub>C45A</sub></b> | <b>Rab32</b>                    | <b>Distance (Å)</b> | <b>GtgE<sub>C45A</sub></b> |
| G59 (O)                   | <b>2.44</b>         | Q33 (NE2)                  | L64                             | <b>3.5</b>          | F34                        |
| V60 (O)                   | <b>2.62</b>         | S144 (OG)                  | F62                             | <b>3.5</b>          | M171                       |
| T57 (O)                   | <b>2.67</b>         | L150 (N)                   | V94                             | <b>3.7</b>          | L145                       |
| D61 (O)                   | <b>2.70</b>         | G146 (N)                   | V60                             | <b>3.8</b>          | L41                        |
| D81 (N)                   | <b>2.75</b>         | G146 (O)                   | W80                             | <b>3.8</b>          | L145                       |
| D61 (OD1)                 | <b>2.76</b>         | L145 (N)                   | L64                             | <b>3.9</b>          | L41                        |
| T57 (OG1)                 | <b>2.88</b>         | G80 (N)                    | I58                             | <b>3.9</b>          | W46                        |
| R76 (NE)                  | <b>2.89</b>         | N39 (OD1)                  | H47                             | <b>3.9</b>          | L78                        |
| D61 (OD2)                 | <b>2.92</b>         | R142 (NH2)                 | I58                             | <b>3.9</b>          | I81                        |
| R76 (NH2)                 | <b>2.93</b>         | T37 (O)                    | T92                             | <b>3.9</b>          | D185                       |
| H47 (NE2)                 | <b>3.03</b>         | I77 (O)                    | I58                             | <b>3.9</b>          | I202                       |
| D61 (OD1)                 | <b>3.10</b>         | R142 (NH1)                 | I58                             | <b>4.0</b>          | C86                        |
| R55 (NH2)                 | <b>3.14</b>         | E79 (OE2)                  | L49                             | <b>4.1</b>          | L78                        |
| I58 (N)                   | <b>3.14</b>         | I81 (O)                    | A56                             | <b>4.1</b>          | I83                        |
| R55 (NH1)                 | <b>3.22</b>         | D82 (OD2)                  | I58                             | <b>4.1</b>          | I141                       |
| R93 (NE)                  | <b>3.23</b>         | D182 (OD1)                 | V94                             | <b>4.1</b>          | D185                       |
| G59 (N)                   | <b>3.24</b>         | L150 (O)                   | G59*                            | <b>4.2*</b>         | A45*                       |
| R93 (NH2)                 | <b>3.27</b>         | D182 (OD1)                 | I58                             | <b>4.2</b>          | L150                       |
| I58 (O)                   | <b>3.29</b>         | I81 (N)                    | I58                             | <b>4.2</b>          | A152                       |
| G59 (O)                   | <b>3.36</b>         | A45 (N)                    | F88                             | <b>4.2</b>          | K194                       |
| V60 (O)                   | <b>3.41</b>         | C149 (SG)                  | Q85                             | <b>4.2</b>          | Y195                       |
| R87 (NH1)                 | <b>3.42</b>         | K194 (O)                   | V66                             | <b>4.3</b>          | N39                        |
| R93 (NH2)                 | <b>3.51</b>         | S179 (OG)                  | T57                             | <b>4.3</b>          | N76                        |
| D61 (O)                   | <b>3.52</b>         | S147 (N)                   | V60                             | <b>4.3</b>          | M171                       |
| D81 (O)                   | <b>3.68</b>         | S147 (N)                   | T36                             | <b>4.4</b>          | E148                       |
| V60 (N)                   | <b>3.70</b>         | N43 (OD1)                  | Y54                             | <b>4.4</b>          | E148                       |
| D61 (O)                   | <b>3.80</b>         | L145 (N)                   | G84                             | <b>4.4</b>          | Y195                       |
| <b>Salt Bridges</b>       |                     |                            |                                 |                     |                            |
| <b>Rab32</b>              | <b>Distance (Å)</b> | <b>GtgE<sub>C45A</sub></b> |                                 |                     |                            |
| K43 (NZ)                  | <b>4.00</b>         | E148 (OE1)                 | [ V60                           | 4.5                 | N43                        |
| K43 (NZ)                  | <b>3.69</b>         | E148 (OE2)                 | T36                             | 4.5                 | E148                       |
| R55 (NE)                  | <b>3.34</b>         | E79 (OE2)                  | A56                             | 4.5                 | C149                       |
| R55 (NH1)                 | <b>3.22</b>         | D82 (OD2)                  | D61                             | 4.5                 | H151                       |
| R55 (NH2)                 | <b>3.14</b>         | E79 (OE2)                  | V94                             | 4.5                 | K186                       |
| R93 (NE)                  | <b>3.23</b>         | D182 (OD1)                 | F88                             | 4.5                 | Y195 ]                     |
| R93 (NE)                  | <b>3.92</b>         | D182 (OD2)                 |                                 |                     |                            |
| R93 (NH2)                 | <b>3.27</b>         | D182 (OD1)                 |                                 |                     |                            |
| R93 (NH2)                 | <b>3.97</b>         | D182 (OD2)                 |                                 |                     |                            |
| D61 (OD1)                 | <b>3.55</b>         | R142 (NH2)                 |                                 |                     |                            |
| D61 (OD1)                 | <b>3.10</b>         | R142 (NH1)                 |                                 |                     |                            |
| D61 (OD2)                 | <b>2.92</b>         | R142 (NH2)                 |                                 |                     |                            |
| D61 (OD2)                 | <b>3.86</b>         | R142 (NH1)                 |                                 |                     |                            |

\* Interaction not shown in Fig. 3E due to mutation in GtgE C45A

[ ] potential interactions with a distance of 4.5 Å not shown in Fig. 3E (bottom)

**Supplementary Table 3.**

Kinetic parameters of GtgE-activity for Rab32:GDP. Data are calculated from conversion rates of Rab32<sub>FL</sub> bands in a densitometric analysis from Coomassie-stained SDS-PAGE assays (Supplementary Fig. 12, 13).

| <b>GtgE</b> | <b>Rab32</b> | <b><math>k_{cat}/K_M</math> (<math>s^{-1}M^{-1}</math>)</b> | <b>Activity relative to WT (%)</b> |
|-------------|--------------|-------------------------------------------------------------|------------------------------------|
| WT          | WT           | $5.1 \times 10^5 \pm 4.9 \times 10^4$                       | 100.0                              |
| Q33A        | WT           | $1.2 \times 10^3 \pm 2.1 \times 10^2$                       | 0.2                                |
| R142A       | WT           | $8.3 \times 10^3 \pm 1.8 \times 10^3$                       | 1.6                                |
| E148A       | WT           | $4.2 \times 10^5 \pm 2.2 \times 10^4$                       | 82.0                               |
| C149A       | WT           | $2.5 \times 10^5 \pm 1.2 \times 10^4$                       | 49.3                               |
| D182A       | WT           | $1.0 \times 10^5 \pm 1.5 \times 10^4$                       | 20.5                               |
| K186A       | WT           | $1.5 \times 10^5 \pm 1.5 \times 10^4$                       | 30.0                               |
| WT          | K43A         | $5.1 \times 10^4 \pm 7.8 \times 10^3$                       | 10.0                               |
| WT          | A56K         | $6.1 \times 10^4 \pm 6.8 \times 10^3$                       | 12.0                               |
| WT          | D61A         | $1.7 \times 10^4 \pm 1.6 \times 10^3$                       | 3.4                                |
| WT          | L64E         | $1.6 \times 10^4 \pm 1.7 \times 10^3$                       | 3.2                                |
| WT          | R87E         | $3.1 \times 10^4 \pm 6.2 \times 10^3$                       | 6.0                                |
| WT          | R93A         | $5.2 \times 10^4 \pm 8.9 \times 10^3$                       | 10.2                               |



### Supplementary References

1. Rak A, *et al.* Structure of Rab GDP-dissociation inhibitor in complex with prenylated Ypt1 GTPase. *Science* **302**, 646-650 (2003).
2. Schrodinger L. The PyMOL Molecular Graphics System, Version 1.8. (2015).
